# Supplementary material for: The enhanced photocatalytic activity and self-cleaning properties of mesoporous SiO2 coated Cu-Bi2O3 thin films
Source: Royal Society of Chemistry journal article supplement (doi:10.1039/c5dt00381d), 2015-01-01
Supplement: c5dt00381d2.pdf [file c5dt00381d2.pdf]

Supporting information:

## Enhanced Photocatalytic Activity and Self-cleaning Property of Mesoporous SiO<sub>2</sub> Coated Cu-Bi<sub>2</sub>O<sub>3</sub> Thin Films

Wenjie Shan, Yun Hu\*, Mengmeng Zheng, Chaohai Wei

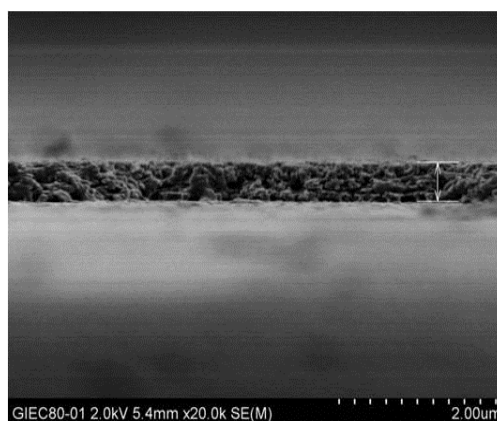

Fig. S1. The cross-section SEM of *meso*-SiO<sub>2</sub>/Cu-Bi<sub>2</sub>O<sub>3</sub> film.

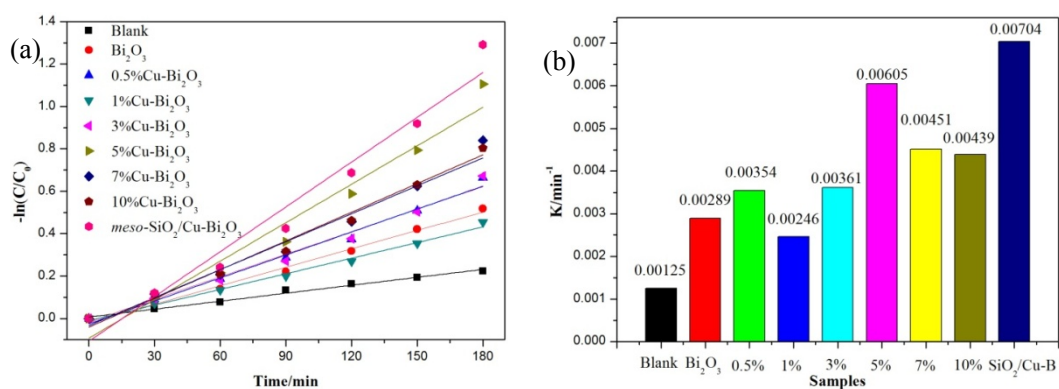

Fig. S2. (a) The  $\ln(C/C_0)$  vs. times curves; (b) the comparison of rate constant  $K$ .

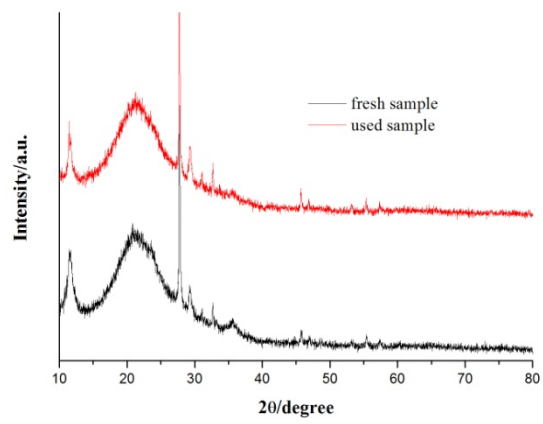

Fig. S3. The XRD patterns of the fresh and used samples.
